# Supplementary material
Source: PubMed Central journal article supplement (PMC2702699)

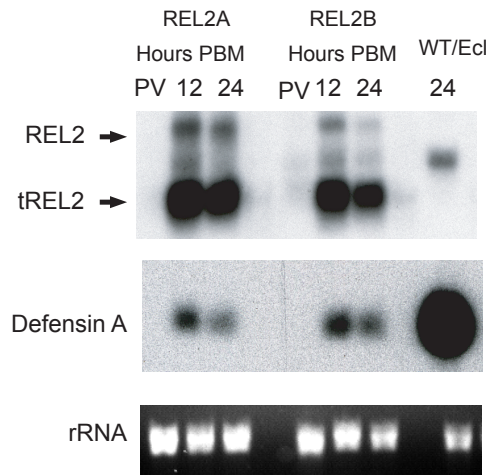

Supplement: NIHMS99400-supplement-01.pdf [file NIHMS99400-supplement-01.pdf]
